# Supplementary material for: The Relationship Between Microbial Community Structures and Environmental Parameters Revealed by Metagenomic Analysis of Hot Spring Water in the Kirishima Area, Japan
Source: PubMed Central journal article supplement (PMC6306410; doi:10.3389/fbioe.2018.00202), 2018-12-20
Supplement: Data_Sheet_1.pdf [file Data_Sheet_1.pdf]

**A**

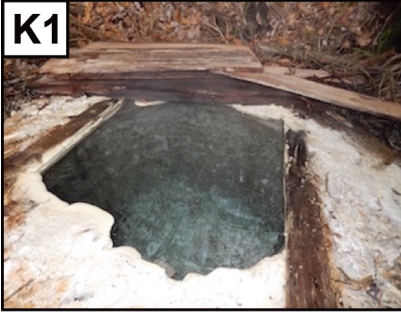

**B**

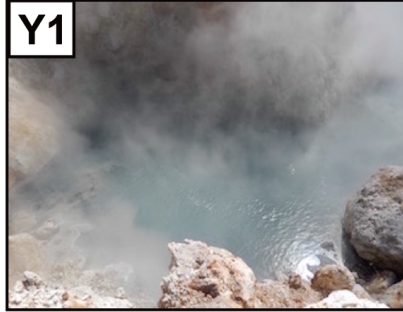

**C**

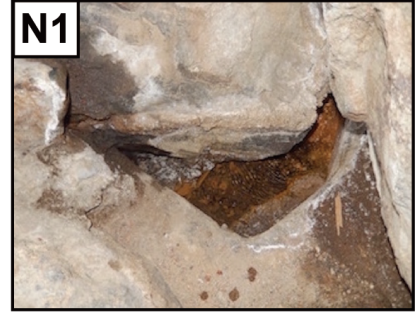

**D**

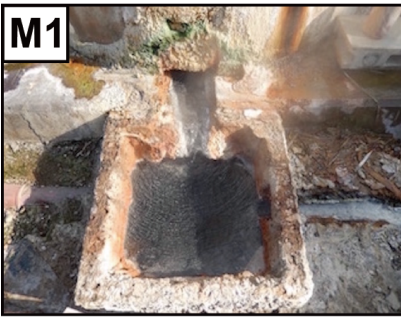

**E**

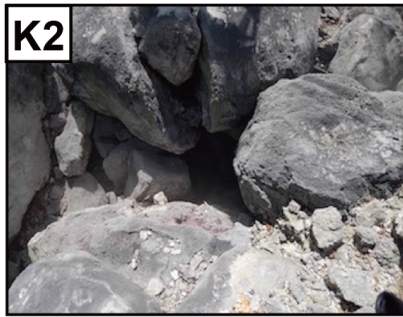

**F**

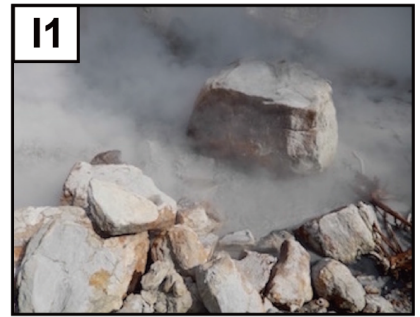

**G**

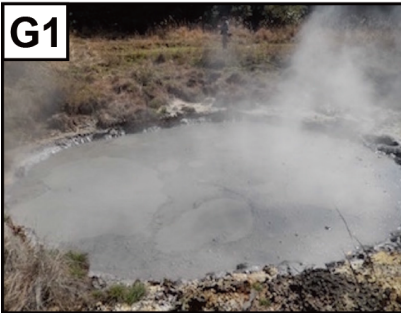

**H**

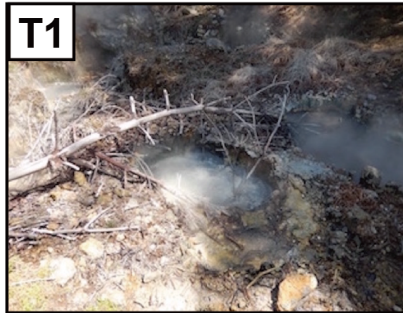

**I**

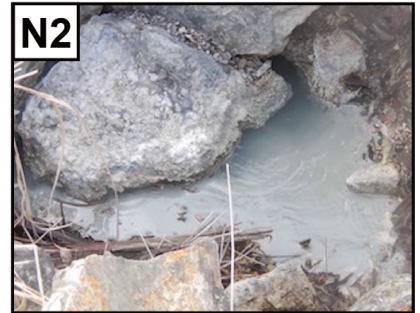

**Supplementary Figure 1. Sampling sites in the Kirishima area, Japan. Site names are spelled out in Figure 1.**
